# Supplementary material for: Measuring X-Chromosome inactivation skew for X-linked diseases with adaptive nanopore sequencing
Source: HighWire-hosted journal article supplement (doi:10.1101/gr.279396.124), 2024-09-16
Supplement: Supplemental_Material.pdf [file Supplemental_Material.pdf]

Supplementary information

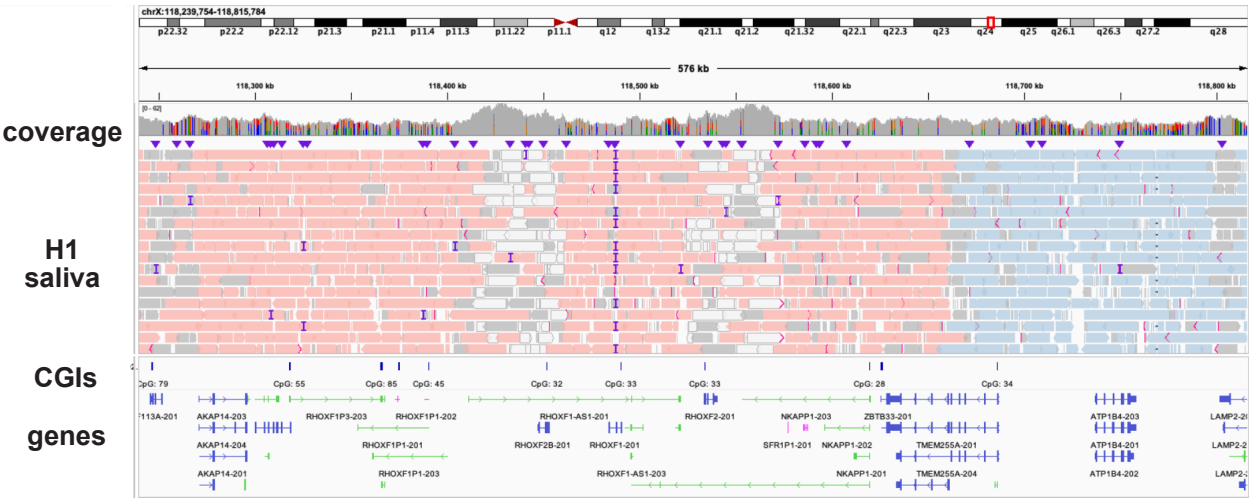

**Supplemental Fig. S 1.** Skew analysis identifies a phasing error. IGV screenshot of H1 saliva sample reads mapped to the *RHOXF2/RHOXF2B* region. Reads are coloured by haplotype block. The tandem repeat leads to ambiguous mapping (white reads) and a phase-switching error within the red haplotype block.
