# Supplementary material for: Measuring X-Chromosome inactivation skew for X-linked diseases with adaptive nanopore sequencing
Source: HighWire-hosted journal article supplement (doi:10.1101/gr.279396.124), 2024-09-16
Supplement: Supplemental_Table_S1.xlsx [file Supplemental_Table_S1.xlsx]

## Sheet: Sheet1
Supplemental Table S1. Sample statistics. Coverage: 50% of the X chromosome has a read depth equal or greater than this number. Read N50: half of the data is contained in reads longer than this value. Haplotype length: sum of the haplotype block lengths. Haplotype_N50: half of the total haplotype block length is contained in blocks longer than this value. Percentage of X chromosome haplotyped: Pr…
ID	sample	coverage	read_N50	haplotype_length	haplotype_N50	pct_chrX_haplotyped	haplotyped_CGIs	pct_haplotyped_CGIs	informative_CGIs	genes_with_CGI	pct_genes_with_CGI
C1	buccal	12	4575	103832352	333103	67	583	66	61	539	65
C1	saliva	23	13560	103832352	333103	67	583	66	254	539	65
C10	blood	21	8734	99815982	296570	65	552	63	267	475	57
C10	buccal	26	6912	99815982	296570	65	552	63	208	475	57
C10	saliva	29	13022	99815982	296570	65	552	63	230	475	57
C11	blood	28	8770	95186385	265335	62	526	60	345	489	59
C11	buccal	26	8182	95186385	265335	62	526	60	261	489	59
C11	saliva	24	12144	95186385	265335	62	526	60	207	489	59
C12	blood	22	9506	109912054	426732	71	603	69	269	565	68
C12	buccal	11	3648	109912054	426732	71	603	69	93	565	68
C12	saliva	24	9393	109912054	426732	71	603	69	202	565	68
C2	buccal	12	5412	89934883	182825	58	456	52	50	401	48
C2	saliva	24	7262	89934883	182825	58	456	52	216	401	48
C3	buccal	18	5732	92369310	245627	60	497	57	170	410	49
C3	saliva	23	11844	92369310	245627	60	497	57	163	410	49
C4	buccal	17	7770	97141356	249077	63	544	62	171	500	60
C4	saliva	21	10430	97141356	249077	63	544	62	248	500	60
C5	buccal	18	6373	97896611	255815	63	529	60	206	471	57
C5	saliva	32	9892	97896611	255815	63	529	60	165	471	57
C6	buccal	15	4187	82434034	212532	53	489	56	139	408	49
C6	saliva	29	10425	82434034	212532	53	489	56	241	408	49
C7	buccal	21	4886	92022499	210137	60	540	61	200	461	55
C7	saliva	27	10904	92022499	210137	60	540	61	204	461	55
C8	buccal	20	6593	109372554	384411	71	583	66	205	562	68
C8	saliva	30	13827	109372554	384411	71	583	66	178	562	68
C9	buccal	10	5453	125544470	685396	81	692	79	52	672	81
C9	saliva	21	18593	125544470	685396	81	692	79	309	672	81
H1	blood	26	10173	102591298	291042	67	579	66	293	494	59
H1	buccal	27	9157	102591298	291042	67	579	66	274	494	59
H1	retina_12oclock	15	10506	102591298	291042	67	579	66	114	494	59
H1	retina_3oclock	13	8664	102591298	291042	67	579	66	57	494	59
H1	retina_6oclock	15	9708	102591298	291042	67	579	66	106	494	59
H1	retina_9oclock	13	9653	102591298	291042	67	579	66	59	494	59
H1	saliva	24	10657	102591298	291042	67	579	66	186	494	59
mouse	neural_stem_cells	26	70673	159568627	13061117	103	454	97	105	NA	NA
R1	blood	32	9806	118948764	560016	77	690	78	439	634	76
R1	buccal	14	2949	118948764	560016	77	690	78	108	634	76
R1	saliva	14	6070	118948764	560016	77	690	78	185	634	76
R2	blood	25	7910	87924170	187080	57	497	57	326	451	54
R2	buccal	16	7899	87924170	187080	57	497	57	93	451	54
R2	saliva	14	7143	87924170	187080	57	497	57	94	451	54
R3	blood	36	9775	114845502	421932	74	630	72	271	591	71
R3	buccal	23	7616	114845502	421932	74	630	72	245	591	71
R3	saliva	31	9970	114845502	421932	74	630	72	203	591	71
R4	blood	22	8226	84993333	169321	55	485	55	294	395	48
R4	buccal	20	6311	84993333	169321	55	485	55	203	395	48
R4	saliva	5	4165	84993333	169321	55	485	55	2	395	48
